1 Positive feedback promotes terrestrial emergence behaviour in an amphibious fish

2

3 Liam Tigert<sup>1,3\*</sup>, Andy J. Turko<sup>1,2</sup> and Patricia A. Wright<sup>1</sup>

4

5

6 <sup>1</sup>Department of Integrative Biology, University of Guelph, Guelph ON Canada, N1G  
7 2W1

8 <sup>2</sup>Department of Biology, McMaster University, Hamilton ON Canada, L8S 4L8

9 <sup>3</sup>Department of Biological Sciences, University of Toronto Scarborough, Toronto ON  
10 Canada, M1C 1A4

11

12 \*Corresponding author: [liam.tigert@mail.utoronto.ca](mailto:liam.tigert@mail.utoronto.ca)

13

14 ORCID information:

15

16 Liam Tigert – <https://orcid.org/0000-0002-1402-5079>

17 Andy Turko – <https://orcid.org/0000-0002-6330-5798>

18 Patricia Wright - <https://orcid.org/0000-0002-4749-5106>

19

20

21 **Keywords:** emersion, hypoxia, gill remodelling, respiration, phenotypic plasticity,  
22 mangrove rivulus, *Kryptolebias marmoratus*

23

24

25

26

27 **Abstract**

28 Major ecological transitions such as the invasion of land by aquatic vertebrates  
29 have been hypothesised to be facilitated by positive feedback between habitat choice  
30 and phenotypic plasticity. We tested whether aquatic hypoxia, emergence behaviour,  
31 and plastic changes in gill surface area could create such a positive feedback loop and  
32 drive an amphibious fish to spend increasing amounts of time out of water. We found  
33 that terrestrially acclimated amphibious mangrove rivulus *Kryptolebias marmoratus*  
34 were more sensitive to, and less tolerant of, aquatic hypoxia relative to water-acclimated  
35 fish, which are necessary trade-offs for positive feedback to occur. Next, we acclimated  
36 fish to normoxic or hypoxic water with the opportunity to emerge for 7d to test the  
37 predictions that fish in hypoxic conditions should regularly leave water, reduce gill  
38 surface area, and become less hypoxia tolerant. Consistent with these predictions, fish  
39 in severe hypoxia spent almost 50% of the time out of water and coverage of the gill  
40 lamellae by an inter-lamellar cell mass almost doubled. Hypoxia acclimated fish were  
41 also more sensitive to acute aquatic hypoxia (emergence at higher oxygen levels), and  
42 lost equilibrium faster in hypoxic water compared to control fish. Thus, we show that a  
43 positive feedback loop develops in amphibious fish where emergence behaviour begets  
44 further emergence behaviour, driven by gill remodelling which reduces aquatic  
45 respiratory function. Such a scenario may explain how amphibious behaviour has  
46 repeatedly evolved in fishes that occupy hypoxic aquatic habitats despite the associated  
47 challenges of life on land.

48

49

## 50 **Introduction**

51

52 Spatial and temporal environmental heterogeneity creates a fundamental  
53 phenotype-environment mismatching problem for animals, as phenotypes well-suited to  
54 one environment are often poorly suited to different environments (Agrawal, 2020). To  
55 minimize these functional trade-offs, animals that inhabit variable environments either  
56 adopt generalist “jack-of-all-trades” phenotypes or are responsive to environmental  
57 conditions (Kassen, 2002; West-Eberhard, 2003). One form of responsiveness is  
58 phenotypic plasticity, the ability of an animal to modify its phenotype to match prevailing  
59 conditions (Pfennig, 2021). Another form of environmental responsiveness occurs when  
60 animals respond to variability by choosing to occupy the most favourable subset of  
61 available habitats (Edelaar et al., 2008). However there is little empirical data about how  
62 plasticity and habitat choice interact to determine phenotypes in heterogeneous  
63 environments (Edelaar and Bolnick, 2019).

64

65 Phenotypic plasticity and habitat choice can theoretically negate or increase the  
66 strength of the other process. For an organism that can always select an optimal  
67 habitat, there is no need for plasticity to improve the environment-phenotype match  
68 (Scheiner, 2016; Edelaar et al., 2017). Similarly, phenotypically plastic animals are often  
69 habitat generalists, as phenotypes can easily be adjusted to suit various conditions  
70 (Asbury and Adolph, 2007; Manenti et al., 2013). However, plasticity and habitat choice  
71 can also reinforce one another via positive feedback, although empirical examples are  
72 rare (Dingemanse and Wolf, 2010; Miner et al., 2005; West-Eberhard, 1989). In  
73 stream-living salamanders, individuals choose to inhabit fast-flowing riffles or slow-  
74 moving pools depending on morphological traits linked to swimming ability; phenotypic  
75 plasticity then reinforces these morphological differences between habitats (Lowe and  
76 Addis, 2019). Similarly, predatory ambush bugs choose to perch on flowers that are a  
77 similarly coloured to their own bodies, and then this match is improved via plastic  
78 changes to body colouration (Boyle and Start, 2020). These examples of habitat choice-  
79 plasticity feedbacks focus on spatially heterogeneous but temporally consistent

80 environments. In many cases, however, environmental conditions vary in both space  
81 and time, but to date there has been little consideration of how plasticity and habitat  
82 choice interact in these scenarios.

83

84 In the face of temporal environmental change, animals must evaluate whether to  
85 remain and use plasticity to mitigate the phenotype-environment mismatch or maintain  
86 their morphological phenotype and move elsewhere (Hendry, 2016; Scheiner 2016). If  
87 environmental changes are gradual, plastic responses that produce a more “tolerant”  
88 phenotype may be expected given that dispersal often has fitness costs (Edelaar et al.,  
89 2008). However, for many environmental variables, there are probably thresholds of  
90 change that cannot be managed via plasticity and therefore require avoidance  
91 behaviour. In these situations, previous acclimation to the changing environment often  
92 results in the expression of a specialist phenotype which may be poorly suited to  
93 alternative environmental conditions due to functional trade-offs. Plastic expression of  
94 an alternative phenotype in the new environment is thus expected, and as the  
95 phenotype-environment match improves, a return to the previously occupied habitat  
96 should become less likely. In this way, the existence of habitat choice-plasticity  
97 feedback may reduce the occurrence of habitat transitions but also increase their  
98 success.

99

100 One of the most dramatic environmental transitions experienced by any animal  
101 occurs when amphibious fishes move between water and land (Ord and Cooke, 2016;  
102 Damsgaard et al., 2019; Turko et al., 2021). The fundamental physical differences  
103 between aquatic and terrestrial habitats result in a suite of functional trade-offs (Dejours,  
104 1989). For example, fishes in water benefit from a large gill surface area that enhances  
105 oxygen uptake and improves tolerance to hypoxia, but in terrestrial conditions large gills  
106 may be a liability because of the potential for damage and evaporative water loss  
107 (Nilsson et al., 2012). This respiratory trade-off is especially problematic for amphibious  
108 fishes, as many species live in hypoxic aquatic habitats (Graham, 1997) and severe  
109 hypoxia is a common proximate reason why amphibious fishes leave water (e.g.  
110 Livingston et al., 2018; Mandic et al., 2009; Urbina et al., 2011; reviewed by Sayer,

111 2005). Once out of water, many amphibious fishes use alternative respiratory surfaces  
112 and gills become largely nonfunctional (Randall, et al., 1981). Some amphibious fishes,  
113 such as the mangrove rivulus *Kryptolebias marmoratus* (Ong et al., 2007) and bichir  
114 *Polypterus senegalus* (Turko et al., 2019a), modulate this gill surface area trade-off  
115 when moving between water and land by altering the size of the interlamellar cell mass  
116 (ILCM). In air, these fishes reversibly increase the ILCM, reducing overall gill surface  
117 area. However, upon the return to water, several days are required to decrease the  
118 ILCM and during this lag-time period respiratory function in water is impaired (Turko et  
119 al., 2012). Thus, by moving to land to escape aquatic hypoxia, and then developing a  
120 slowly reversed terrestrial gill morphology that limits oxygen uptake in water, a feedback  
121 loop may emerge that promotes terrestrial habitat choice (Turko et al., 2018).

122

123 We experimentally tested the hypothesis that habitat choice (behavioural hypoxia  
124 avoidance) and morphological plasticity (gill remodelling) reinforce one another in a  
125 positive feedback loop using the amphibious mangrove rivulus as a model. These fish  
126 readily move between water and land, survive prolonged episodes out of water, and  
127 experience severely hypoxic aquatic habitats in the wild (Taylor, 2012; Wright, 2012,  
128 Rossi et al., 2019). We first tested the critical predictions that terrestrial acclimation  
129 should decrease aquatic hypoxia tolerance and increase the sensitivity of the hypoxic  
130 emergence response. Next, we tested the prediction that hypoxia acclimation should  
131 cause emergence behaviour to become more frequent, and subsequent hypoxia  
132 tolerance should decrease (due to gill remodelling on land). In this hypoxia acclimation  
133 experiment, we observed that some fish remained in water despite extremely low  
134 oxygen saturation. To understand how these fish were able to obtain sufficient oxygen  
135 under these conditions, we quantified the usage of aquatic surface respiration (ASR) by  
136 mangrove rivulus across a range of dissolved oxygen concentrations.

137

## 138 **Methods**

### 139 *Experimental Animals*

140 Adult *K. marmoratus* hermaphrodites (0.09 g  $\pm$  0.02 g) originating from Belize (strain  
141 50.91; Tatarenkov et al., 2010) and maintained in a breeding colony at the University of

142 Guelph were used in these experiments. We kept fish individually in 120 ml clear plastic  
143 containers filled with 60 ml of brackish water (15‰, 25°C, 12-hour light:dark cycle), and  
144 fed them *Artemia* nauplii three times a week (Frick and Wright, 2002). Air exposure (7d)  
145 was achieved by placing fish on a brackish water-saturated filter paper substrate in  
146 standard housing containers (Ong et al., 2007). Control fish were held in identical  
147 containers filled with water and were fasted for the 7d acclimation period because  
148 mangrove rivulus are unable to feed while on land (Turko et al., 2019b; Wells et al.,  
149 2015).

150

### 151 *Experimental Protocol*

152

#### 153 *Series 1 - Plasticity of hypoxia sensitivity and tolerance*

154 To test how hypoxia sensitivity varied between air- and water-acclimated fish, we  
155 measured the acute emergence response of each acclimation group (water n=10, air  
156 n=10) as described previously (Regan et al., 2011, Livingston et al 2018). In brief, we  
157 placed individual fish into a two-part container, comprised of a lower section filled with  
158 water at 25°C, and an air-exposed platform that allowed fish to leave water. The fish  
159 were left in the lower section for 30 minutes to allow for recovery from handling stress, a  
160 time period determined to be sufficient in preliminary experiments. Atmospheric air was  
161 bubbled for the final 15 minutes of this acclimation period through an airline attached to  
162 the bottom of the water-filled container to acclimate the fish to gently bubbling water.  
163 We then remotely switched the air line to nitrogen gas and measured water oxygen  
164 saturation using a fibre optic oxygen probe (Witrox-4, Loligo Systems, Copenhagen,  
165 Denmark). We decreased the oxygen from 21 kPa to 0 kPa over 20 minutes and  
166 recorded the oxygen level at which the fish emerged.

167 To assess hypoxia tolerance, we measured time until loss of equilibrium (LOE)  
168 under severe hypoxia using standard methods (Regan et al., 2017). Briefly, we placed  
169 fish (water n=6, air n=6) into small, mesh sided chambers, and left them submerged in  
170 brackish water for 15 minutes to recover from handling stress. These chambers were  
171 then gently submerged into a 5-gallon glass aquarium to prevent the fish from reaching  
172 the air-water interface. The aquarium was covered with plastic film to prevent gas

173 exchange with atmospheric air. Again, the fish were left to recover from handling stress  
174 for another 15 minutes, during which time oxygen concentration did not appreciably  
175 decrease. Then, we bubbled the water with compressed nitrogen gas to decrease the  
176 oxygen partial pressure of the water from 21 kPa to 0.5 kPa over 10 minutes, at which  
177 point it was held constant at 0.5 kPa for the remainder of the experiment (Regan and  
178 Richards, 2017; Regan et al., 2017). We recorded the time until the fish lost equilibrium,  
179 that is when the fish did not respond to the physical stimulus of three gentle prods.

180

### 181 *Series 2 - Emergence behaviour and hypoxia sensitivity*

182 To test the prediction that hypoxia acclimation should increase the frequency of  
183 emergence and subsequent decrease hypoxia tolerance, we acclimated fish (7d) to one  
184 of three oxygen levels: normoxia (21 kPa oxygen; n = 20), hypoxia (2.1 kPa oxygen, n  
185 =20) or extreme hypoxia (0.5 kPa; n = 15). Within each group, fish were acclimated to  
186 either water or air for 7d immediately before the experiment began to determine if  
187 differences in gill morphology caused by air- versus water-acclimation influence  
188 emergence behaviour in hypoxia. Fish were held individually in a two-part container with  
189 a platform for emergence as described previously (Livingston et al., 2018). These  
190 containers were similar to the ones used to assess the hypoxic emergence response  
191 (described above), except the lower, water-filled portion of the containers were mesh-  
192 sided and submerged in a larger water bath, allowing for free circulation of water  
193 maintained at one of three oxygen levels: We maintained oxygen levels within the basin  
194 with an oxygen control system (OxyCTRL, Loligo Systems, Copenhagen, Denmark) that  
195 automatically bubbled compressed nitrogen gas into a header tank when oxygen  
196 concentrations exceeded the experimental setpoint. We video recorded fish behaviour  
197 from above using a webcam during the 12 hours of light per day, as we previously found  
198 that there is no difference in emergence behaviour between day and night (Turko et al.,  
199 2011), and subsequently measured the proportion of time each fish spent out of water  
200 per day. At the conclusion of the 7d experiment, we tested the acute emergence  
201 response or time to LOE on random subsets of fish as described above.

202 We assessed gill surface area in a subsample of fish to determine if there was a  
203 relationship between behaviour and gill morphology. Fish were euthanized using MS-



204 222 and processed for histology as described previously (Turko et al., 2011). We  
205 measured the height of the ILCMs in 5 randomly selected gill filaments for each fish and  
206 calculated the average proportion of ILCM cover per fish.

207

### 208 *Series 3 - Aquatic surface respiration*

209 We noticed that some fish in the extreme hypoxia treatment (0.5 kPa O<sub>2</sub>) never  
210 lost equilibrium despite remaining in water for lengths of time that far exceeded the  
211 degree of tolerance we measured in our LOE experiments, and hypothesised the fish  
212 were obtaining supplemental oxygen using aquatic surface respiration (ASR; Kramer  
213 and McClure, 1982). To test this hypothesis, we placed fish (air-acclimated n = 4, water-  
214 acclimated n=5) in a 30 cm upright mesh tube, inside of a 5-gallon glass aquarium filled  
215 halfway with water at 25°C and allowed them to recover for 15 minutes. The sides of the  
216 aquarium were covered, except for one viewing window, to limit external influences on  
217 fish behaviour. After the recovery from handling stress, we slowly introduced nitrogen  
218 gas into the water to reduce oxygen levels at a constant rate (-0.4 kPa oxygen/min),  
219 mixed thoroughly with stir bars, over the span of 50 minutes. Each trial was video  
220 recorded for its duration, and we subsequently quantified the proportion of time fish  
221 used ASR as a function of oxygen saturation in the water.

222

### 223 *Statistical Analysis*

224 All statistics were calculated using R version 4.0.2. To compare oxygen  
225 saturation at emergence and time to LOE in water- versus air-acclimated fish, we used  
226 Student's t-tests (Series 1). To compare oxygen saturation at emergence, time to LOE,  
227 and gill ILCM coverage in fish after acclimation to normoxic, hypoxic, or extremely  
228 hypoxic water (Series 2), we used two-way ANOVA, followed by Tukey's post-hoc tests.  
229 To assess changes in emergence behaviour over time within each acclimation  
230 condition, we used permutational two-way ANOVA (1,000,000 permutations, package  
231 *permuco*; Frossard and Renaud 2019) because our data did not meet assumptions of  
232 normality or homoscedasticity. Permutational ANOVA is similar to a parametric ANOVA,  
233 but rather than assuming a Gaussian distribution, the dataset is repeatedly randomized,  
234 and the proportion of randomly ordered datasets with greater treatment effects than the



235 actual dataset is calculated. We used a series of two-way ANOVAs (one per oxygen  
236 tension) rather than a single three-way ANOVA because we found a marginal 3-way  
237 interaction in our exploratory analysis ( $F = 1.73$ ,  $p = 0.056$ ) and because the key  
238 predictions made by the positive feedback hypothesis relate to patterns over time within  
239 each treatment rather than statistical comparison among treatments. Post-hoc  
240 comparisons were calculated using permutational t-tests (1,000,000 permutations)  
241 implemented using the `pairwise.perm.t.test` function (package *RVAideMemoire*, Hervé  
242 2020), and p-values were adjusted for multiple comparisons using the Benjamini and  
243 Yekutieli correction which controls the false discovery rate (Benjamini & Yekutieli,  
244 2001). We used similar permutational ANOVA and post-hoc permutation t-tests (with  
245 Benjamini and Yekutieli corrected p-values) to assess changes in the proportion of time  
246 fish used aquatic surface respiration during the induction of hypoxia (Series 3), as these  
247 data did not meet parametric assumptions of normality or homoscedasticity.

248

## 249 **Results**

250 The hypoxic emergence response of air-acclimated fish was almost twice as  
251 sensitive as that of water-acclimated fish (t-test  $p = 0.004$ ; Fig. 1A). Hypoxia tolerance  
252 (time to LOE) of air-acclimated fish was approximately half that of water-acclimated fish  
253 (t-test  $p = 0.0007$ ; Fig. 1B).

254 In our habitat choice experiment, exposure to aquatic hypoxia dramatically  
255 increased the amount of time fish spent out of water (Fig. 2). Fish in normoxia rarely  
256 emerged from water over the course of the trial, and emergence frequency in previously  
257 air-acclimated fish slightly but significantly decreased over the 7d trial (time \*  
258 acclimation  $p = 0.0069$ ; Fig. 2A). In moderate hypoxia, emergence frequency similarly  
259 decreased over time, and previously air-acclimated fish initially spent significantly more  
260 time out of water than water-acclimated fish (time \* acclimation  $p = 0.0072$ ; Fig. 2B). In  
261 extreme hypoxia, fish regularly emerged from water (~30% of the time) but this did not  
262 depend on previous acclimation condition ( $p = 0.12$ ) nor time ( $p = 0.057$ , interaction  $p =$   
263  $0.11$ ; Fig. 2C).

264 At the end of the habitat choice experiment, hypoxia-acclimated fish had a  
265 significantly more sensitive hypoxic emergence response compared to fish acclimated

266 to normoxic conditions (two-way ANOVA,  $p < 0.0001$ ; Fig. 3A). Acclimation to aquatic  
267 hypoxia also decreased hypoxia tolerance (time to LOE) by about 50% (two-way  
268 ANOVA,  $p < 0.00001$ ; Fig. 3B). Finally, acclimation to extreme aquatic hypoxia almost  
269 doubled the proportion of gill lamellae that were covered by an inter-lamellar cell mass  
270 compared to normoxic conditions (two-way ANOVA,  $p = 0.002$ ; Fig. 2C). In all cases,  
271 there was no significant effect of previous acclimation to air versus water (all  $p > 0.05$ ).

272 Mangrove rivulus significantly increased their use of aquatic surface respiration  
273 when oxygen tension fell below 10 kPa ( $P < 0.0005$ ; Fig. 4). At the lowest  $P_{O_2}$  we tested  
274 (1.5 kPa), fish used aquatic surface respiration for 95% of the recording period. This  
275 pattern of aquatic surface respiration was not affected by prior acclimation to air or  
276 water ( $P > 0.05$ ; Fig. 4).

277

## 278 **Discussion**

279 Our results are generally consistent with the hypothesis that hypoxia-induced  
280 emergence behaviour becomes self-reinforcing via positive feedback as gill remodelling  
281 on land decreases respiratory function in water and promotes further emergence  
282 behaviour. We found three lines of evidence that support this hypothesis. First, air-  
283 acclimation increased the sensitivity to hypoxia as fish emerged at higher oxygen levels  
284 relative to water-acclimated fish. Second, when reintroduced to an aquatic environment,  
285 air-acclimated fish emerged more frequently and for longer durations than water-  
286 acclimated fish across all oxygen treatment groups. These are both necessary  
287 conditions for the establishment of a positive feedback loop. Finally, after a week of  
288 exposure to hypoxic water with access to land, hypoxia sensitivity increased while  
289 hypoxia tolerance decreased. Overall, our data indicate that emergence behaviour is an  
290 important strategy for coping with adverse aquatic conditions in this species, consistent  
291 with previous studies (Rossi et al., 2019; Turko et al., 2018). Importantly, our data also  
292 indicates that this emergence behaviour makes it increasingly difficult for these fish to  
293 maintain homeostasis in hypoxic water. We suggest that this sort of positive feedback  
294 between plasticity and habitat choice has widespread potential to generate extreme  
295 phenotypes in animals. Furthermore, we speculate that if habitat choice-plasticity

296 feedback results in genetic assimilation (Crispo, 2007; Pigliucci et al., 2006; Schneider  
297 and Meyer, 2017), this process may accelerate evolutionary habitat transitions such as  
298 the invasion of land by fishes.

### 299 *Requirements for positive feedback*

300 There are two key elements necessary to generate positive feedback between  
301 habitat choice and phenotypic plasticity. First, expressions of plasticity that improve  
302 performance in one habitat must also decrease performance in alternative habitats (i.e.  
303 an antagonistic trade-off). Second, an animal must be capable of assessing its own  
304 phenotype and using this information to choose suitable habitats (i.e. matching habitat  
305 choice; Camacho et al., 2020). Our data indicate that both elements exist for mangrove  
306 rivulus moving between water and land, suggesting that the positive feedback  
307 hypothesis is plausible.

308 Mangrove rivulus face a suite of physiological trade-offs when moving between  
309 aquatic and terrestrial environments, the first requirement for positive feedback to occur.  
310 Many of these trade-offs involve the oxygen transport cascade. Gill remodelling on land  
311 may reduce evaporative water loss in air but also decreases the capacity for oxygen  
312 uptake in water (Turko et al., 2012). Angiogenesis of epithelial capillaries on land  
313 enhances aerial oxygen uptake (Blanchard et al., 2019) perhaps at the cost of oxygen  
314 loss to hypoxic water (Scott et al., 2017). The oxygen binding affinity of hemoglobin also  
315 increases in air, but in water this may impair oxygen offloading to metabolically active  
316 tissues (Tunnah et al., 2021; Turko et al., 2014). Terrestrially induced hypertrophy of  
317 oxidative trunk muscle (Brunt et al., 2016; Rossi et al., 2018) may also detrimentally  
318 increase metabolic oxygen demand in hypoxic aquatic environments. In this study, we  
319 found that terrestrial acclimation decreased overall aquatic hypoxia tolerance (i.e. time  
320 to loss of equilibrium) by over 50%, indicating that the combined effects of these  
321 physiological trade-offs have a dramatic organism-level consequence.

322 We also found evidence that habitat choice depends on physiological state (i.e. self-  
323 assessment), fulfilling the second requirement for positive feedback. When acutely  
324 challenged with progressive aquatic hypoxia, air-acclimated fish emerged at oxygen  
325 concentrations that were more than double that of water-acclimated fish (1.8 vs. 4.2

326 kPa). This result implies that mangrove rivulus can self-assess their physiological  
327 tolerance of aquatic hypoxia and make adaptive anticipatory decisions, as the  
328 concentrations of oxygen that elicited emergence were ~3-8 fold higher than the  
329 concentrations that these fish could tolerate for 20-40 min in our LOE experiments. The  
330 mechanism(s) used for self-assessment of hypoxia sensitivity are not known, but  
331 previous work has found that the hypoxic emergence response of this species is  
332 regulated by oxygen-sensitive neuroepithelial cells (Regan et al., 2011). One possibility  
333 is that self-assessment occurs via internally oriented neuroepithelial cells that sense  
334 blood  $P_{O_2}$  (Perry et al., 2009), as impaired respiratory function in air-acclimated fish  
335 would presumably cause a faster decrease in blood  $P_{O_2}$  compared to water-acclimated  
336 fish. Understanding the mechanism of self-assessment is an exciting area for future  
337 research.

#### 338 *Establishment of an experimental positive feedback loop*

339 Our habitat choice experiment provides further evidence for positive feedback  
340 between gill plasticity and habitat choice. We found that fish acclimated to extreme  
341 aquatic hypoxia spent substantial amounts of time out of water (~30% of the  
342 experiment, 70-fold more than controls in normoxic water) and were more sensitive to  
343 aquatic hypoxia than fish acclimated to normoxia or moderate hypoxia. Fish in the  
344 extreme aquatic hypoxia group were also less hypoxia tolerant (i.e. time to LOE was  
345 reduced by ~40%) and had reduced functional gill surface area. Notably, these plastic  
346 changes are opposite to those typically observed with hypoxia acclimation in fishes  
347 (Perry et al., 2009; Richards, 2009). For example, when mangrove rivulus were  
348 prevented from leaving water during hypoxia acclimation, respiratory function improved  
349 and gill surface area increased (Turko et al., 2012). Overall, our results indicate that  
350 when mangrove rivulus are given the choice between living in extremely hypoxic water  
351 or on land, the respiratory phenotype is shaped by the terrestrial habitat. Thus,  
352 behavioural habitat choice may be a key factor that determines physiological tolerance  
353 of extreme environments.

354 While fish in the extreme aquatic hypoxia treatment spent much more time out of  
355 water than fish in the other treatments, as expected, we did not find any change in

356 emergence rates over the course of the 7d experiment. This result is inconsistent with  
357 the positive feedback hypothesis, which predicts an increase in emergence over time.  
358 Emergence was also surprisingly low in the moderate hypoxia treatment considering  
359 that that this oxygen concentration (2.1 kPa) acutely elicited an emergence response in  
360 our experiments and is lower than the critical oxygen tension of this species (Turko et  
361 al., 2012). Wild mangrove rivulus under similarly hypoxic conditions spent ~90% of their  
362 time on land (Turko et al., 2018). One explanation for the low rates of emergence in our  
363 experiment was the extensive use of aquatic surface respiration (Chapman and  
364 Mckenzie, 2009; Kramer and McClure, 1982). At the levels of aquatic hypoxia we used,  
365 mangrove rivulus spent more than 80% of the time displaying this behaviour. We  
366 suggest that this extensive use of aquatic surface respiration may be a laboratory  
367 artefact, as in the wild ASR exposes fish to predation (Domenici et al., 2007; Kramer,  
368 1983; Riesch et al., 2010) and mangrove rivulus do not appear to frequently use this  
369 behaviour in the wild (A. Turko, personal observation). Another possibility is that the low  
370 rates of emergence at moderate hypoxia occurred because our experimental conditions  
371 were more benign than typical conditions in the field. In addition to hypoxia, wild  
372 mangrove rivulus are exposed to intraspecific aggression, high temperatures,  
373 hypercarbia, and high levels of hydrogen sulfide; variables all known to cause fish to  
374 leave water (Cochrane et al., 2019; Gibson et al., 2015; Robertson et al., 2015; Taylor,  
375 1990). These additional factors may additively increase the overall amount of time  
376 rivulus spend out of water. Nonetheless, our results illustrate the interactive effects of  
377 habitat choice and physiological plasticity. Even subtle habitat choice, i.e. a shift up in  
378 the water column to use ASR, minimized the severity of hypoxia experienced by  
379 mangrove rivulus and blunted the plastic responses to gill morphology and respiratory  
380 function that occur when fish cannot access the air-water interface.

381 We noticed a high degree of variation in the tendency of individual fish to leave  
382 water in our long-term behaviour experiment, especially in the extreme hypoxia  
383 treatment. A similar degree of individual variation in emergence behaviour has been  
384 previously reported for this species (Turko et al., 2011). We hypothesise that positive  
385 feedback between habitat choice and phenotypic plasticity acts to accentuate individual  
386 differences in behaviour and may in part explain the high degree of variation we

387 observed. For example, some individuals may be slightly more likely to leave water as  
388 adults (e.g. due to developmental plasticity or epigenetic effects). This behaviour in turn  
389 causes an increase in the size of the ILCM and may therefore strengthen the tendency  
390 to emerge from water, which could ultimately lead to highly divergent behavioural  
391 phenotypes among individuals. Previous work has shown that relatively bold birds  
392 choose habitats with higher levels of disturbance, and these habitats may reinforce bold  
393 phenotypes (Holtmann et al., 2017). Currently, little is known about how matching  
394 habitat choice and variances in individual behaviour affects ecological outcomes, but we  
395 think this is an important area for future work.

### 396 *Perspectives*

397 A fundamental goal of physiological ecology is understanding the processes that  
398 promote phenotype-environment matching (Bolnick and Otto, 2013; Edelaar et al.,  
399 2008). At the level of individual animals, the two most important mechanisms are  
400 behavioural habitat choice and phenotypic plasticity. These mechanisms are often  
401 studied in isolation, and modelling studies have even suggested that selection should  
402 favour one or the other depending on the type of environmental variation an animal  
403 experiences (Botero et al., 2015; Edelaar et al., 2017; Scheiner, 2016). However, our  
404 results combined with other empirical studies (Boyle and Start, 2020; Lowe and Addis,  
405 2019) indicate that plasticity and matching habitat choice interact and even positively  
406 feed back on one another. Understanding these interactions can be important for  
407 interpreting patterns of phenotypic variation and predicting how animals will respond to  
408 changing environments. For example, our data showing that hypoxia-acclimated  
409 mangrove rivulus have relatively low gill surface area and hypoxia tolerance cannot be  
410 explained without considering both plasticity and habitat choice. Understanding the  
411 conditions that give rise to habitat choice-plasticity feedback interactions versus habitat  
412 choice or plasticity alone is an important area for future research.

413 Positive feedback moves systems away from equilibrium and as a result this  
414 feedback been hypothesized to facilitate major evolutionary transitions (Crespi, 2004;  
415 Hendry, 2016) such as the invasion of land. For example, on evolutionary timescales,  
416 phenotypic change coupled with matching habitat choice is thought to promote local

417 adaptation and potentially speciation (Camacho et al., 2020; Jacob et al., 2017; Muñoz  
418 and Losos, 2018; Nicolaus and Edelaar, 2018). Our results indicate that analogous  
419 feedback between plasticity and habitat choice can cause phenotypic divergence within  
420 the lifetime of individuals. Given that expressions of plasticity can cause evolutionary  
421 change through genetic assimilation (Crispo, 2007; Pigliucci et al., 2006; Schneider and  
422 Meyer, 2017), we speculate that positive feedback between habitat choice and plasticity  
423 may be an important first step in generating similar evolutionary feedback between  
424 these processes. For example, populations of mangrove rivulus that inhabit moderately  
425 versus severely hypoxic habitats should differ in emergence rates and thus respiratory  
426 phenotype. If these environmental differences persist, evolutionary processes (e.g.  
427 genetic assimilation and/or the altered selective environment) may reinforce the  
428 phenotypic divergence between populations. Over time, this mechanism may therefore  
429 promote a major ecological transition by producing terrestrially adapted fishes that have  
430 poor aquatic performance due to respiratory trade-offs.



431

432 **Acknowledgements**

433 We thank Matt Regan, Giulia Rossi, Louise Tunnah, and Paige Cochrane for helpful  
434 discussions, and Matt Cornish, Mike Davies, Abiran Sritharan for animal care. This work  
435 was supported by the National Sciences and Engineering Research Council of Canada  
436 (NSERC) graduate scholarship to AJT and an NSERC Discovery Grants to PAW.

437

438 **Figure 1. Sensitivity and tolerance of *Kryptolebias marmoratus* to aquatic**  
439 **hypoxia after acclimation to water or air.** (A) Partial pressure of oxygen at the point  
440 of emergence (n=10/treatment). (B) Time until loss of equilibrium at 0.5 kPa  
441 (n=6/treatment). Water-acclimated fish are shown in blue, air-acclimated fish are shown  
442 in orange. Small points denote raw values, large points denote group means, and error  
443 bars show standard error. An asterisk denotes significant difference between  
444 acclimation treatments ( $p < 0.05$ ).

445 **Figure 2. Habitat choice in *Kryptolebias marmoratus* acclimated to varying**  
446 **levels of aquatic hypoxia.** Proportion of time air- or water-acclimated fish spent on  
447 land during exposure to water of one of three oxygen pressures: (A) normoxia (21 kPa;  
448 n=20), (B) hypoxia (2.1 kPa, n=20, and (C) extreme hypoxia (0.5 kPa, n=15). Water-  
449 acclimated fish are shown in blue, air-acclimated fish are shown in orange. Small points  
450 denote raw values, large points denote group means, and error bars show standard  
451 error. Different letters within an acclimation group denote statistical differences over  
452 time ( $p < 0.05$ ). An asterisk denotes significant difference between acclimation  
453 treatments ( $p < 0.05$ ).

454 **Figure 3. Phenotypic plasticity of *Kryptolebias marmoratus* after acclimation**  
455 **to varying levels of aquatic hypoxia with access to terrestrial habitats.** Water  
456 oxygen pressure at the point of emergence (A) and time until loss of equilibrium (B) and  
457 the proportion of the gill covered by an ILCM (C) between *K. marmoratus* acclimated to  
458 air or water for seven days, followed by a return to water with one of three oxygen  
459 pressures, over another seven days. Water-acclimated fish are shown in blue, air-  
460 acclimated fish are shown in orange. Small points denote raw values, large points  
461 denote group means, and error bars show standard error. Different letters denote a  
462 significant difference between oxygen pressure treatment.

463 **Figure 4. Use of aquatic surface respiration by *Kryptolebias marmoratus*.**  
464 Proportion of time water- or air-acclimated fish spent at the surface in response to  
465 decreasing oxygen concentrations (n=6/treatment; note the reversed x-axis). Water-  
466 acclimated fish are shown in blue, air-acclimated fish are shown in orange. Small points

467 denote raw values, large points denote group means, and error bars show standard  
468 error. Different letters denote overall statistical differences between levels of oxygen ( $p$   
469  $< 0.05$ ).

470

471

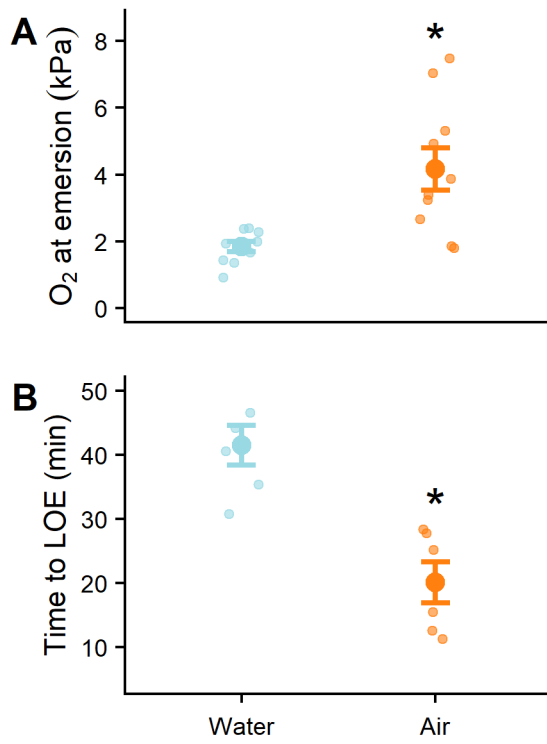

472

473 Figure 1.

474

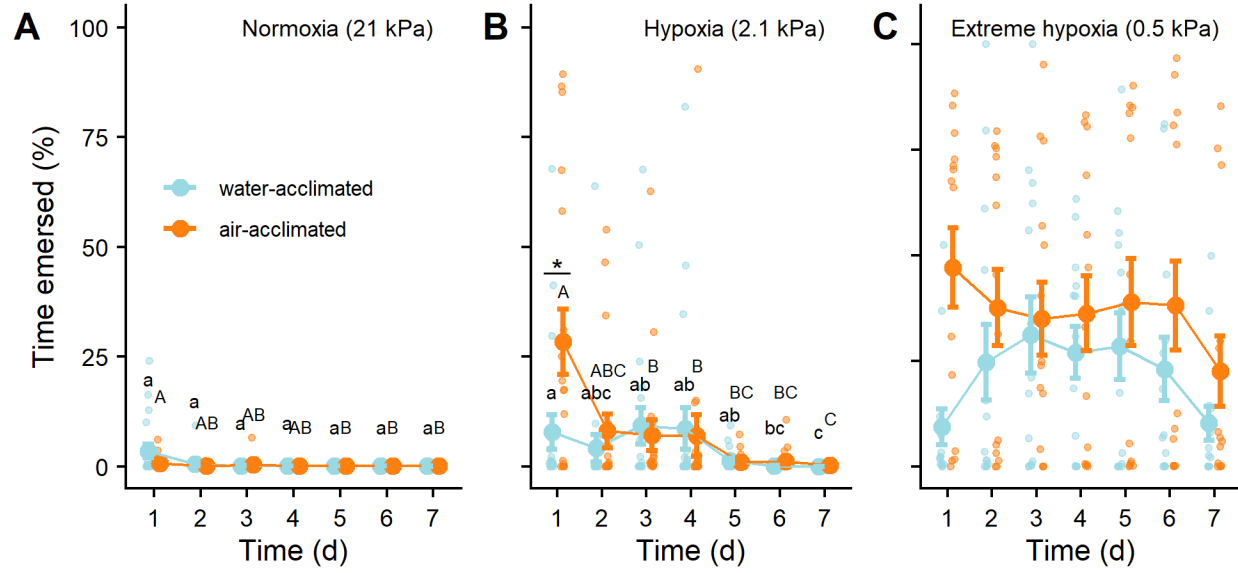

475

476

477

Figure 2.

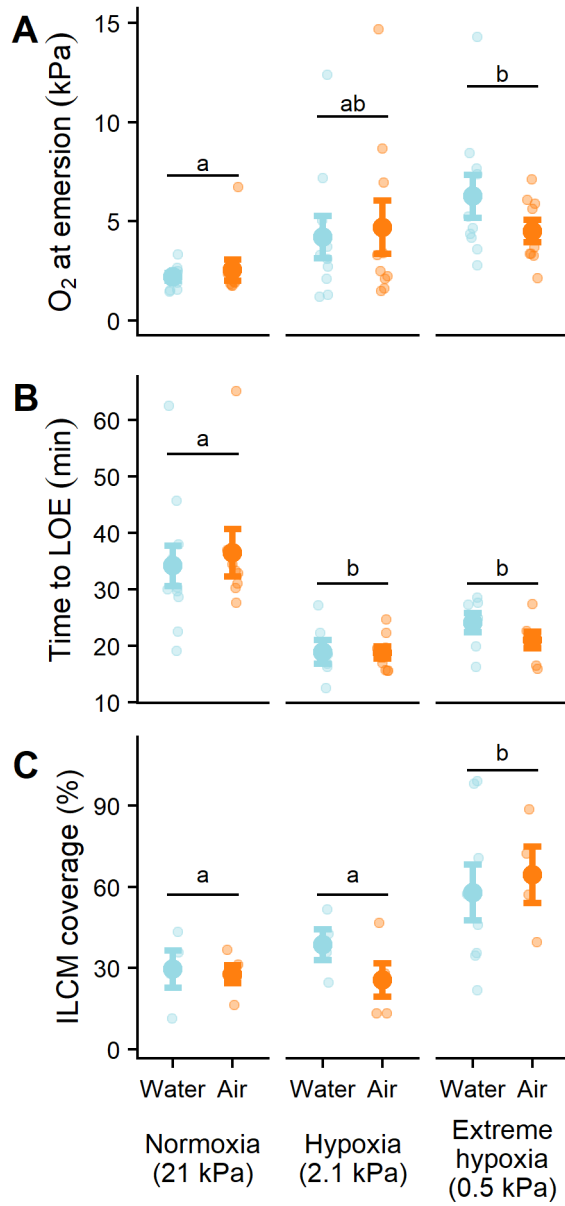

478

479

480 Figure 3.

481

482

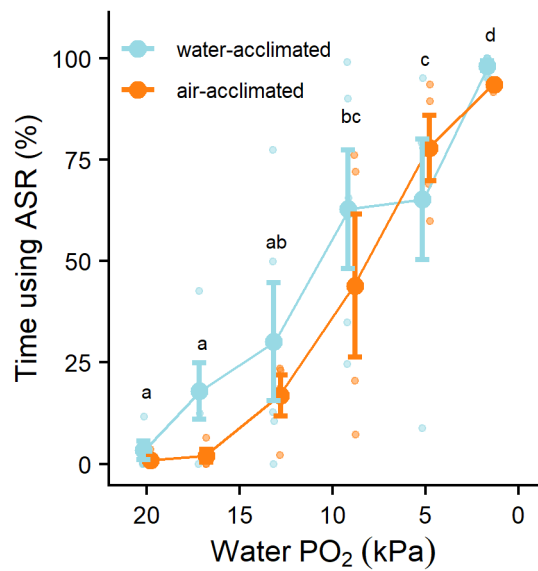

483

484 Figure 4.

485



- 486
- 487 **Agrawal, A. A.** (2020). A scale-dependent framework for trade-offs, syndromes, and  
488 specialization in organismal biology. *Ecology* **101**, 1–24.
- 489 **Asbury, D. A. and Adolph, S. C.** (2007). Behavioural plasticity in an ecological  
490 generalist: Microhabitat use by western fence lizards. *Evol. Ecol. Res.* **9**, 801–815.
- 491 **Blanchard, T. S., Whitehead, A., Dong, Y. W. and Wright, P. A.** (2019). Phenotypic  
492 flexibility in respiratory traits is associated with improved aerial respiration in an  
493 amphibious fish out of water. *J. Exp. Biol.* **222**,.
- 494 **Bolnick, D. I. and Otto, S. P.** (2013). The magnitude of local adaptation under  
495 genotype-dependent dispersal. *Ecol. Evol.* **3**, 4722–4735.
- 496 **Botero, C. A., Weissing, F. J., Wright, J. and Rubenstein, D. R.** (2015). Evolutionary  
497 tipping points in the capacity to adapt to environmental change. *Proc. Natl. Acad.*  
498 *Sci. U. S. A.* **112**, 184–189.
- 499 **Boyle, J. and Start, D.** (2020). Plasticity and habitat choice match colour to function in  
500 an ambush bug. *Funct. Ecol.* **34**, 822–829.
- 501 **Brunt, E. M., Turko, A. J., Scott, G. R. and Wright, P. A.** (2016). Amphibious fish  
502 jump better on land after acclimation to a terrestrial environment. *J. Exp. Biol.* **219**,  
503 3204–3207.
- 504 **Camacho, C., Sanabria-Fernández, A., Baños-Villalba, A. and Edelaar, P.** (2020).  
505 Experimental evidence that matching habitat choice drives local adaptation in a wild  
506 population. *Proc. R. Soc. B* **287**,.
- 507 **Chapman, L. J. and McKenzie, D. J.** (2009). Chapter 2 Behavioral Responses and  
508 Ecological Consequences. *Fish Physiol.* **27**, 25–77.
- 509 **Cochrane, P. V., Rossi, G. S., Tunnah, L., Jonz, M. G. and Wright, P. A.** (2019).  
510 Hydrogen sulphide toxicity and the importance of amphibious behaviour in a  
511 mangrove fish inhabiting sulphide-rich habitats. *J. Comp. Physiol. B Biochem. Syst.*  
512 *Environ. Physiol.* **189**, 223–235.

- 513 **Crespi, B. J.** (2004). Vicious circles: Positive feedback in major evolutionary and  
514 ecological transitions. *Trends Ecol. Evol.* **19**, 627–633.
- 515 **Crispo, E.** (2007). The Baldwin effect and genetic assimilation: Revisiting two  
516 mechanisms of evolutionary change mediated by phenotypic plasticity. *Evolution*  
517 (N. Y). **61**, 2469–2479.
- 518 **Damsgaard, C., Baliga, V. B., Bates, E., Burggren, W., McKenzie, D. J., Taylor, E.**  
519 **and Wright, P. A.** (2019). Evolutionary and Cardio-Respiratory Physiology of  
520 Air-breathing and Amphibious Fishes. *Acta Physiol.*
- 521 **Dejours, P.** (1989). Respiration in Water and Air in Intertidal Fishes, pp. 54–78.
- 522 **Dingemans, N. J. and Wolf, M.** (2010). Recent models for adaptive personality  
523 differences: A review. *Philos. Trans. R. Soc. B Biol. Sci.* **365**, 3947–3958.
- 524 **Domenici, P., Lefrançois, C. and Shingles, A.** (2007). Hypoxia and the antipredator  
525 behaviours of fishes. *Philos. Trans. R. Soc. B Biol. Sci.* **362**, 2105–2121.
- 526 **Drummond, G. B., & Vowler, S. L.** (2012). Different tests for a difference: How do we  
527 do research? *Journal of Physiology-London*, 590, 235–238.
- 528 **Edelaar, P. and Bolnick, D. I.** (2019). Appreciating the Multiple Processes Increasing  
529 Individual or Population Fitness. *Trends Ecol. Evol.* **34**, 435–446.
- 530 **Edelaar, P., Siepielski, A. M. and Clobert, J.** (2008). Matching habitat choice causes  
531 directed gene flow: A neglected dimension in evolution and ecology. *Evolution (N.*  
532 *Y).* **62**, 2462–2472.
- 533 **Edelaar, P., Jovani, R. and Gomez-Mestre, I.** (2017). Should I change or should I go?  
534 Phenotypic plasticity and matching habitat choice in the adaptation to  
535 environmental heterogeneity. *Am. Nat.* **190**, 506–520.
- 536 **Frick, N. T. and Wright, P. A.** (2002). Nitrogen metabolism and excretion in the  
537 mangrove killifish *Rivulus marmoratus* L. The influence of environmental salinity and  
538 external ammonia. *J. Exp. Biol.* **205**, 79–89.

- 539 **Frossard, J and Renaud, O.** (2019). permuco: Permutation Tests for Regression,  
540 (Repeated Measures) ANOVA/ANCOVA and Comparison of Signals. R package  
541 version 1.1.0. <https://CRAN.R-project.org/package=permuco>  
542
- 543 **Gibson, D. J., Sylvester, E. V. A., Turko, A. J., Tattersall, G. J. and Wright, P. A.**  
544 (2015). Out of the frying pan into the air-emersion behaviour and evaporative heat  
545 loss in an amphibious mangrove fish (*Kryptolebias marmoratus*). *Biol. Lett.* **11**,.
- 546 **Graham, J. B.** (1997). *Air-breathing fishes: evolution, diversity, and adaptation*.
- 547 **Hendry, A. P.** (2016). Key questions on the role of phenotypic plasticity in eco-  
548 evolutionary dynamics. *J. Hered.* **107**, 25–41.
- 549 **Hervé, M.** (2020). RVAideMemoire: Testing and Plotting Procedures for Biostatistics. R  
550 package version 0.9-77. <https://CRAN.R-project.org/package=RVAideMemoire>
- 551 **Holtmann, B., Santos, E. S. A., Lara, C. E. and Nakagawa, S.** (2017). Personality-  
552 matching habitat choice, rather than behavioural plasticity, is a likely driver of a  
553 phenotype–environment covariance. *Proc. R. Soc. B Biol. Sci.* **284**,.
- 554 **Jacob, S., Legrand, D., Chaine, A. S., Bonte, D., Schtickzelle, N., Huet, M. and**  
555 **Clobert, J.** (2017). Gene flow favours local adaptation under habitat choice in  
556 ciliate microcosms. *Nat. Ecol. Evol.* **1**, 1407–1409.
- 557 **Kassen, R.** (2002). The experimental evolution of specialists, generalists, and the  
558 maintenance of diversity. *J. Evol. Biol.* **15**, 173–190.
- 559 **Kramer, D. L.** (1983). The evolutionary ecology of respiratory mode in fishes: an  
560 analysis based on the costs of breathing. *Environ. Biol. Fishes* **9**, 145–158.
- 561 **Kramer, D. L. and McClure, M.** (1982). Aquatic surface respiration, a widespread  
562 adaptation to hypoxia in tropical freshwater fishes. *Environ. Biol. Fishes* **1982** **71** **7**,  
563 47–55.
- 564 **Livingston, M. D., Bhargav, V. V., Turko, A. J., Wilson, J. M. and Wright, P. A.**  
565 (2018). Widespread use of emersion and cutaneous ammonia excretion in  
566 Aplocheiloid killifishes. *Proc. R. Soc. B Biol. Sci.* **285**,.

- 567 **Lowe, W. H. and Addis, B. R.** (2019). Matching habitat choice and plasticity contribute  
568 to phenotype–environment covariation in a stream salamander. *Ecology* **100**, 1–14.
- 569 **Mandic, M., Sloman, K. A. and Richards, J. G.** (2009). Escaping to the surface: A  
570 phylogenetically independent analysis of hypoxia-induced respiratory behaviors in  
571 sculpins. *Physiol. Biochem. Zool.* **82**, 730–738.
- 572 **Manenti, R., Denoël, M. and Ficetola, G. F.** (2013). Foraging plasticity favours  
573 adaptation to new habitats in fire salamanders. *Anim. Behav.* **86**, 375–382.
- 574 **Miner, B. G., Sultan, S. E., Morgan, S. G., Padilla, D. K. and Relyea, R. A.** (2005).  
575 Ecological consequences of phenotypic plasticity. *Trends Ecol. Evol.* **20**, 685–692.
- 576 **Muñoz, M. M. and Losos, J. B.** (2018). Thermoregulatory behavior simultaneously  
577 promotes and forestalls evolution in a tropical lizard. *Am. Nat.* **191**, E15–E26.
- 578 **Nicolaus, M. and Edelaar, P.** (2018). Comparing the consequences of natural  
579 selection, adaptive phenotypic plasticity, and matching habitat choice for  
580 phenotype–environment matching, population genetic structure, and reproductive  
581 isolation in meta-populations. *Ecol. Evol.* **8**, 3815–3827.
- 582 **Nilsson, G. E., Dymowska, A. and Stecyk, J. A. W.** (2012). New insights into the  
583 plasticity of gill structure. *Respir. Physiol. Neurobiol.* **184**, 214–222.
- 584 **Ong, K. J., Stevens, E. D. and Wright, P. A.** (2007). Gill morphology of the mangrove  
585 killifish (*Kryptolebias marmoratus*) is plastic and changes in response to terrestrial  
586 air exposure. *J. Exp. Biol.* **210**, 1109–1115.
- 587 **Ord, T. J. and Cooke, G. M.** (2016). Repeated evolution of amphibious behavior in fish  
588 and its implications for the colonization of novel environments. *Evolution* **70**, 1747–  
589 1759.
- 590 **Perry, S. F., Jonz, M. G. and Gilmour, K. M.** (2009). Chapter 5 Oxygen Sensing And  
591 The Hypoxic Ventilatory Response. *Fish Physiol.* **27**, 193–253.
- 592 **Pfennig, D. W.** (2021). *Phenotypic Plasticity and Evolution; Causes, Consequences,*  
593 *Controversies.*

- 594 **Pigliucci, M., Murren, C. J. and Schlichting, C. D.** (2006). Phenotypic plasticity and  
595 evolution by genetic assimilation. *J. Exp. Biol.* **209**, 2362–2367.
- 596 **Randall, David, Burggren Warren, Farrell, A. P. S. H.** (1981). *The Evolution of Air*  
597 *Breathing in Vertebrates*. Stony Brook Foundation, Inc.
- 598 **Regan, M. D. and Richards, J. G.** (2017). Rates of hypoxia induction alter mechanisms  
599 of O<sub>2</sub> uptake and the critical O<sub>2</sub> tension of goldfish. *J. Exp. Biol.* **220**, 2536–2544.
- 600 **Regan, K. S., Jonz, M. G. and Wright, P. A.** (2011). Neuroepithelial cells and the  
601 hypoxia emersion response in the amphibious fish *Kryptolebias marmoratus*. *J.*  
602 *Exp. Biol.* **214**, 2560–2568.
- 603 **Regan, M. D., Gill, I. S. and Richards, J. G.** (2017). Metabolic depression and the  
604 evolution of hypoxia tolerance in threespine stickleback, *Gasterosteus aculeatus*.  
605 *Biol. Lett.* **13**,.
- 606 **Richards, J. G.** (2009). Chapter 10 Metabolic and Molecular Responses of Fish to  
607 Hypoxia. *Fish Physiol.* **27**, 443–485.
- 608 **Riesch, R., Oranth, A., Dzienko, J., Karau, N., Schießl, A., Stadler, S., Wigh, A.,**  
609 **Zimmer, C., Arias-Rodriguez, L., Schlupp, I., et al.** (2010). Extreme habitats are  
610 not refuges: poeciliids suffer from increased aerial predation risk in sulphidic  
611 southern Mexican habitats. *Biol. J. Linn. Soc.* **101**, 417–426.
- 612 **Robertson, C. E., Turko, A. J., Jonz, M. G. and Wright, P. A.** (2015). Hypercapnia  
613 and low pH induce neuroepithelial cell proliferation and emersion behaviour in the  
614 amphibious fish *Kryptolebias marmoratus*. *J. Exp. Biol.* **218**, 2987–2990.
- 615 **Rossi, G. S., Turko, A. J. and Wright, P. A.** (2018). Oxygen drives skeletal muscle  
616 remodeling in an amphibious fish out of water. *J. Exp. Biol.* **221**,.
- 617 **Rossi, G. S., Tunnah, L., Martin, K. E., Turko, A. J., Taylor, D. S., Currie, S. and**  
618 **Wright, P. A.** (2019). Mangrove fishes rely on emersion behavior and physiological  
619 tolerance to persist in sulfidic environments. *Physiol. Biochem. Zool.* **92**, 316–325.
- 620 **Sayer, M. D. J.** (2005). Adaptations of amphibious fish for surviving life out of water.

- 621 *Fish Fish.* **6**, 186–211.
- 622 **Scheiner, S. M.** (2016). Habitat Choice and Temporal Variation Alter the Balance  
623 between Adaptation by Genetic Differentiation, a Jack-of-All-Trades Strategy, and  
624 Phenotypic Plasticity. *Am. Nat.* **187**, 633–646.
- 625 **Schneider, R. F. and Meyer, A.** (2017). How plasticity, genetic assimilation and cryptic  
626 genetic variation may contribute to adaptive radiations. *Mol. Ecol.* **26**, 330–350.
- 627 **Scott, G. R., Matey, V., Mendoza, J. A., Gilmour, K. M., Perry, S. F., Almeida-Val, V.**  
628 **M. F. and Val, A. L.** (2017). Air breathing and aquatic gas exchange during hypoxia  
629 in armoured catfish. *J. Comp. Physiol. B Biochem. Syst. Environ. Physiol.* **187**,  
630 117–133.
- 631 **Tatarenkov, A., Ring, B. C., Elder, J. F., Bechler, D. L. and Avise, J. C.** (2010).  
632 Genetic composition of laboratory stocks of the self-fertilizing fish *Kryptolebias*  
633 *marmoratus*: A valuable resource for experimental research. *PLoS One* **5**, 1–9.
- 634 **Taylor, D. S.** (1990). Adaptive specializations of the Cyprinodont fish *Rivulus*  
635 *marmoratus*. *Florida Sci.* **53**, 239–248.
- 636 **Taylor, D. S.** (2012). Twenty-four years in the mud: What have we learned about the  
637 natural history and ecology of the mangrove rivulus, *kryptolebias marmoratus*?  
638 *Integr. Comp. Biol.* **52**, 724–736.
- 639 **Tunnah, L., Robertson, C. E., Turko, A. J. and Wright, P. A.** (2021). Acclimation to  
640 prolonged aquatic hypercarbia or air enhances hemoglobin-oxygen affinity in an  
641 amphibious fish. *Comp. Biochem. Physiol. Part A Mol. Integr. Physiol.* **252**, 110848.
- 642 **Turko, A. J. and Wright, P. A.** (2015). Evolution, ecology and physiology of  
643 amphibious killifishes (Cyprinodontiformes). *J. Fish Biol.* **87**, 815–835.
- 644 **Turko, A. J., Earley, R. L. and Wright, P. A.** (2011). Behaviour drives morphology:  
645 Voluntary emersion patterns shape gill structure in genetically identical mangrove  
646 rivulus. *Anim. Behav.* **82**, 39–47.
- 647 **Turko, A. J., Cooper, C. A. and Wright, P. A.** (2012). Gill remodelling during terrestrial



- 648 acclimation reduces aquatic respiratory function of the amphibious fish *Kryptolebias*  
649 *marmoratus*. *J. Exp. Biol.* **215**, 3973–3980.
- 650 **Turko, A. J., Robertson, C. E., Bianchini, K., Freeman, M. and Wright, P. A.** (2014).  
651 The amphibious fish *Kryptolebias marmoratus* uses different strategies to maintain  
652 oxygen delivery during aquatic hypoxia and air exposure. *J. Exp. Biol.* **217**, 3988–  
653 3995.
- 654 **Turko, A. J., Tatarenkov, A., Currie, S., Earley, R. L., Platek, A., Taylor, D. S. and**  
655 **Wright, P. A.** (2018). Emersion behaviour underlies variation in gill morphology and  
656 aquatic respiratory function in the amphibious fish *Kryptolebias marmoratus*.
- 657 **Turko, A. J., Maini, P., Wright, P. A. and Standen, E. M.** (2019a). Gill remodelling  
658 during terrestrial acclimation in the amphibious fish *Polypterus senegalus*. *J.*  
659 *Morphol.* **280**, 329–338.
- 660 **Turko, A. J., Doherty, J. E., Yin-Liao, I., Levesque, K., Kruth, P., Holden, J. M.,**  
661 **Earley, R. L. and Wright, P. A.** (2019b). Prolonged survival out of water is linked  
662 to a slow pace of life in a self-fertilizing amphibious fish. *J. Exp. Biol.* **222**,
- 663 **Urbina, M. A., Forster, M. E. and Glover, C. N.** (2011). Leap of faith: Voluntary  
664 emersion behaviour and physiological adaptations to aerial exposure in a non-  
665 aestivating freshwater fish in response to aquatic hypoxia. *Physiol. Behav.* **103**,  
666 240–247.
- 667 **Wells, M. W., Turko, A. J. and Wright, P. A.** (2015). Fish embryos on land: Terrestrial  
668 embryo deposition lowers oxygen uptake without altering growth or survival in the  
669 amphibious fish *Kryptolebias marmoratus*. *J. Exp. Biol.* **218**, 3249–3256.
- 670 **West-Eberhard, M. J.** (1989). Phenotypic plasticity and the origins of diversity. *Annu.*  
671 *Rev. Ecol. Syst.* Vol. 20 249–278.
- 672 **West-Eberhard, M. J.** (2003). Developmental Plasticity and Evolution. 794.
- 673 **Wright, P. A.** (2012). Environmental physiology of the mangrove rivulus, *kryptolebias*  
674 *marmoratus*, a cutaneously breathing fish that survives for weeks out of water.  
675 *Integr. Comp. Biol.* **52**, 792–800.



676 **Wright, P. A. and Turko, A. J.** (2016). Amphibious fishes: evolution and phenotypic  
677 plasticity. *J. Exp. Biol.* **219**, 2245–2259.

678

679

680

681
